# Supplementary material for: Aerosol-induced closure of marine cloud cells: enhanced effects in the presence of precipitation
Source: Copernicus journal article supplement (doi:10.5194/acp-24-6455-2024), 2024-06-03
Supplement: Supplementary file 2 [file acp-24-6455-2024-supplement.zip]

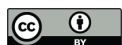

*Supplement of*

**Aerosol-induced closure of marine cloud cells: enhanced effects in the presence of precipitation**

**Matthew W. Christensen et al.**

*Correspondence to:* Matthew W. Christensen ([matt.christensen@pnnl.gov](mailto:matt.christensen@pnnl.gov))

- [acp-24-6455-2024-supplement-title-page.pdf](#)
- [MovieS1.mp4](#)
- [Supplement.pdf](#)
- [WRF\\_namelist.zip](#)

The copyright of individual parts of the supplement might differ from the article licence.
